# Supplementary material for: Grape-Seed Proanthocyanidins Modulate Adipose Tissue Adaptations to Obesity in a Photoperiod-Dependent Manner in Fischer 344 Rats
Source: MDPI journal article supplement (doi:10.3390/nu15041037), 2023-02-19
Supplement: s1 [file s1]

**Table S1. Phenolic Composition of GSPE**

| Phenolic Compound        | Concentration (μmol/g) |
|--------------------------|------------------------|
| Catechin                 | 58                     |
| Dimeric procyanidins     | 250                    |
| Epicatechin              | 52                     |
| Epigallocatechin         | 5.50                   |
| Epicatechin gallate      | 89                     |
| Epigallocatechin gallate | 1.40                   |
| Hexameric procyanidins   | 0.38                   |
| Pentameric procyanidins  | 0.73                   |
| Tetrameric procyanidins  | 8.8                    |
| Trimericprocyanidins     | 1568                   |

**Table S2. Primers for the Q-PCR analysis.**

|                                 | <b>Forward (5'...3')</b> | <b>Reverse (5'...3')</b> |
|---------------------------------|--------------------------|--------------------------|
| <i>Ucp1</i>                     | GGTACCCACATCAGGCAACA     | TCTGCTAGGCAGGCAGAAAC     |
| <i>Prdm16</i>                   | GTTCTGCGTGGATGCCAATC     | TGGCGAGGTTTTGGTCATCA     |
| <i>Cpt1<math>\beta</math></i>   | GCAAACCTGGACCGAGAAGAG    | CCTTGAAGAAGCGACCTTTG     |
| <i>Cd36</i>                     | CAGTGCAGAAACAGTGGTTGTCT  | TGACATTTGCAGGTCCATCTATG  |
| <i>Ppia</i>                     | CTTCGAGCTGTTTGCAGACAA    | AAGTCACCACCCTGGCACATG    |
| <i>Ppar<math>\gamma</math></i>  | AGGGCGATCTTGACAGGAAA     | CGAAACTGGCACCCCTTGAAA    |
| <i>C/ebp<math>\alpha</math></i> | TGTACTGTATGTCGCCAGCC     | TGGTTTAGCATAGACGCGCA     |
| <i>Acac<math>\alpha</math></i>  | GCGGCTCTGGAGGTATATGT     | TCTGTTTAGCGTGGGGATGT     |
| <i>Fasn</i>                     | TAAGCGGTCTGGAAAGCTGA     | CACCAGTGTTTGTTCCCTCGG    |
| <i>Atgl</i>                     | GAAGACCCTGCCTGCTGATT     | CACATAGCGCACCCCTTGAA     |
| <i>Hsl</i>                      | AGTTCCCTCTTTACGGGTGG     | GCTTGGGGTCAGAGGTAGT      |
| <i>Ppar<math>\alpha</math></i>  | CGGCGTTGAAAACAAGGAGG     | TTGGGTTCCATGATGTCGCA     |
| <i>Fabp4</i>                    | GAAAGAAGTGGGAGTTGGCT     | TACTCTCTGACCGGATGACG     |
| <i>Dio2</i>                     | TTATGGGGTAGCCTTTGAACG    | CCAGCCAACTTCGGACTT       |
| <i>Pgc1<math>\alpha</math></i>  | AGAGTCACCAAATGACCCCAAG   | TTGGCTTTATGAGGAGGAGTCG   |
| <i>Lep</i>                      | ATTCACACACGCAGTCGGTAT    | CCCGGGAATGAAGTCCAAA      |
| <i>Adipoq</i>                   | GTTCCAGGACTCAGGATGCT     | CGTCTCCCTTCTCTCCCTTC     |
| <i>Il6</i>                      | ATATGTTCTCAGGGAGATCTTGAA | TGCATCATCGCTGTTCATACAA   |
| <i>Tnf<math>\alpha</math></i>   | CGTCAGCCGATTTGCCATTTT    | TGGGCTCATACCAGGGCTTGAG   |

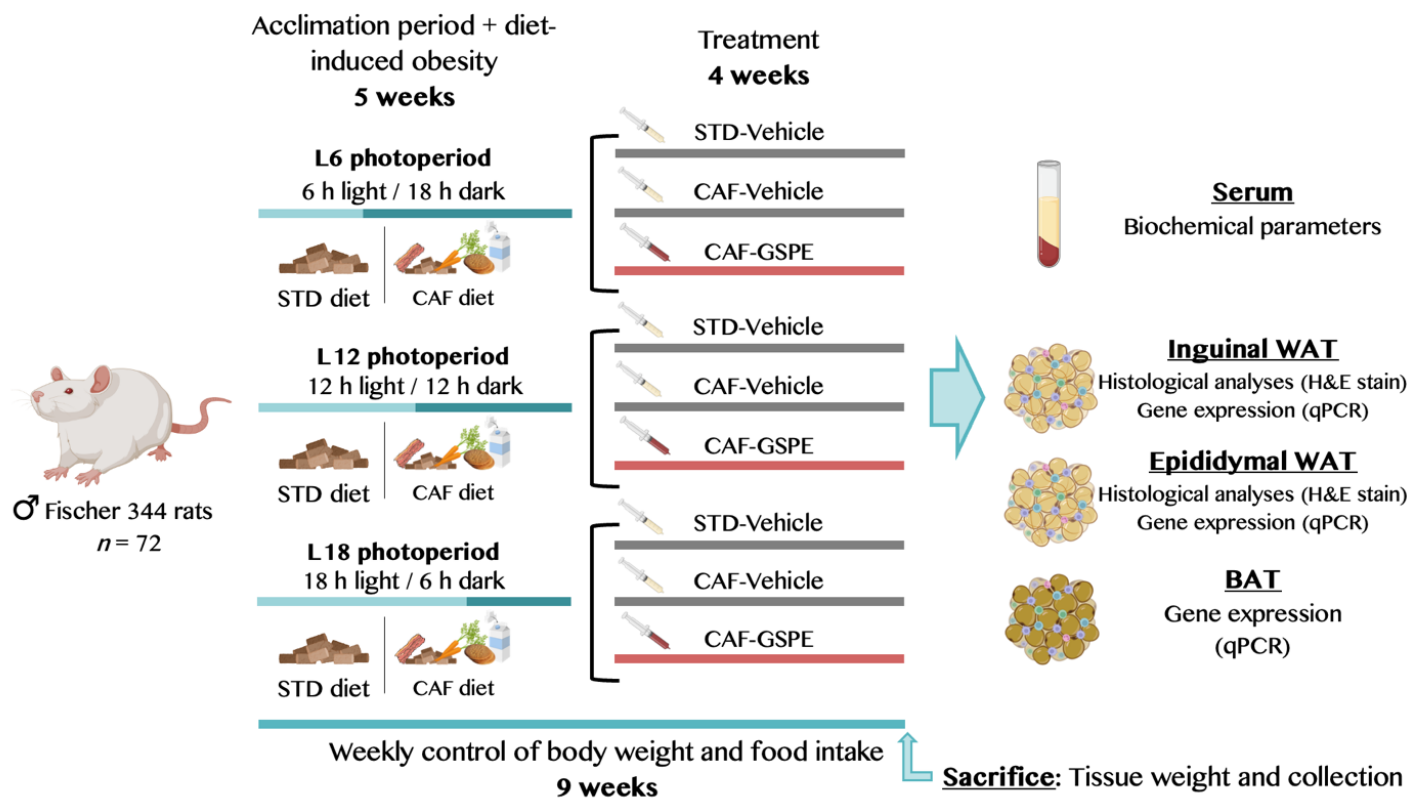

**Figure S1.** Experimental design used in this study.

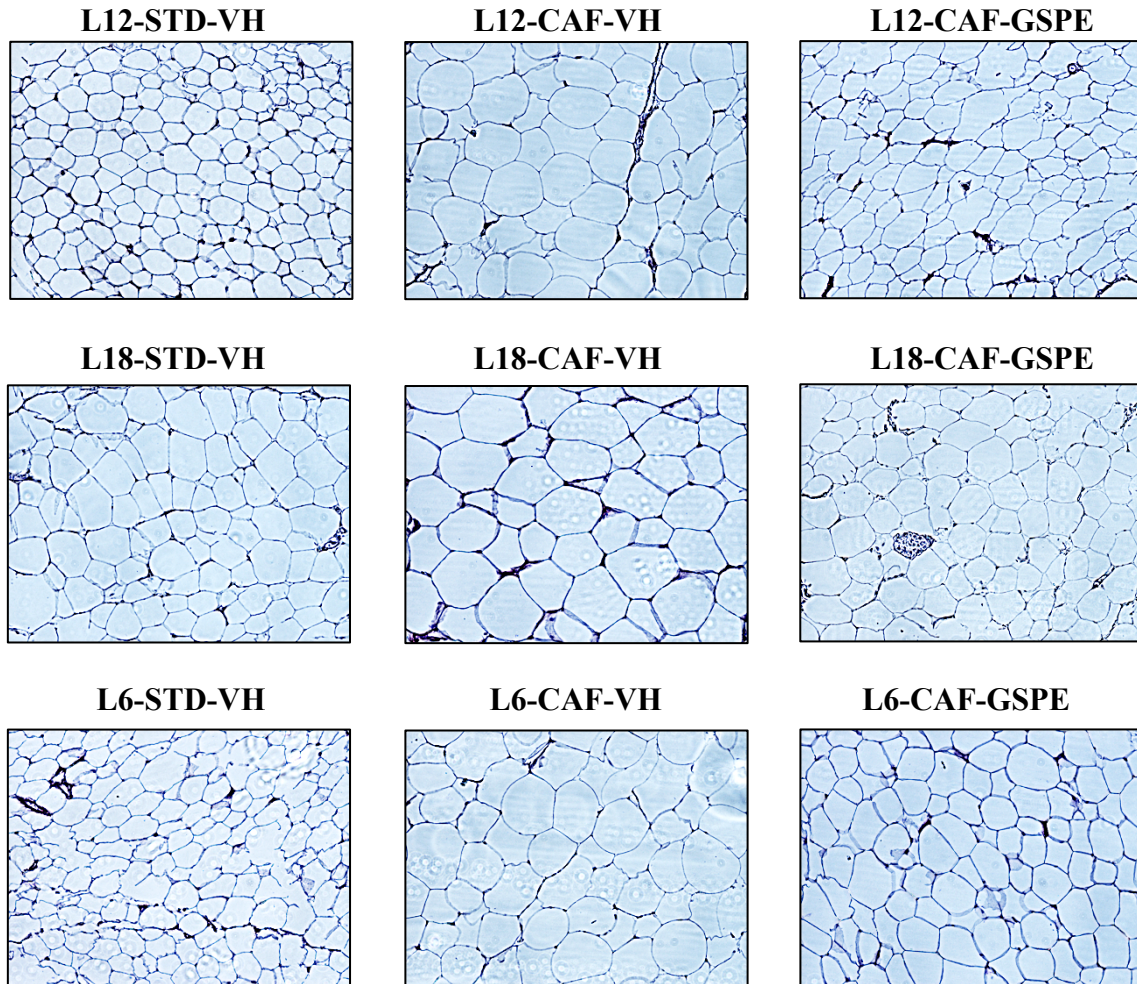

**Figure S2. Representative images of iWAT histology.** Histological study of iWAT morphology of Fischer 344 rats fed with standard diet (STD) or cafeteria diet (CAF) for 9 weeks and treated with GSPE (25 mg/kg body weight) or vehicle (VH) the last 4 weeks of the study; STD-VH group; CAF-VH group; CAF-GSPE group, under different photoperiods; L12, L18 or L6.

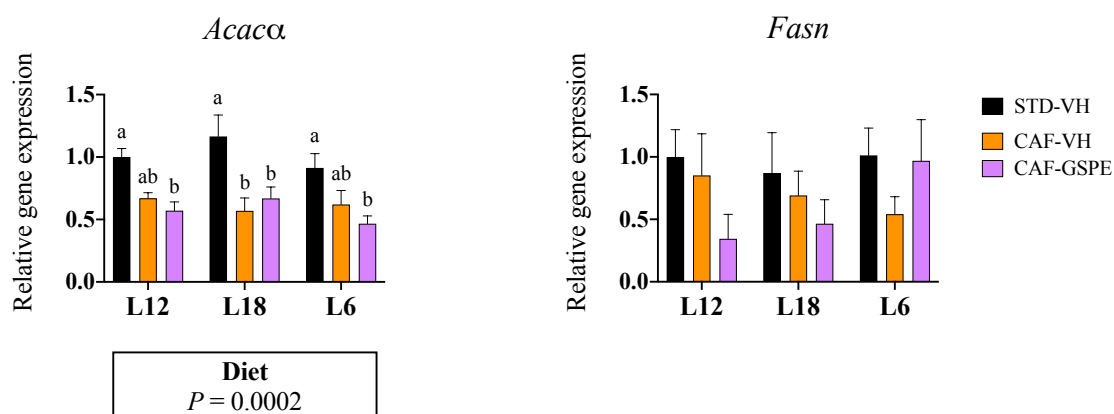

**Figure S3.** Effect of grape seed proanthocyanidin extract (GSPE) consumption at different photoperiods, 12h of light:12h of darkness (L12); 18h of light:6h of darkness (L18); 6h of light:18h of darkness (L6) on the gene expression of *Acaca* and *Fasn* in inguinal white adipose tissue (iWAT) of diet-induced obese rats. Fisher 344 rats were fed standard diet (STD) or cafeteria diet (CAF) for 9 weeks and treated with GSPE (25 mg/kg body weight) or vehicle (VH) the last 4 weeks of the study; STD-VH group; CAF-VH group; CAF-GSPE group, under different photoperiods; L12, L18 or L6. The gene expression was measured by qPCR and normalized by *Ppia*. The relative expression (presented as fold-change) of CAF-VH and CAF-GSPE was normalized to the corresponding STD-VH control group (L12 photoperiod). Significant differences were assessed through two-way ANOVA analysis ( $P < 0.05$ ). **Diet:** diet effect within VH groups. Different letters denote significant differences within each photoperiod group (assessed with two-way ANOVA followed by Tukey's *post hoc* test,  $p < 0.05$ ).



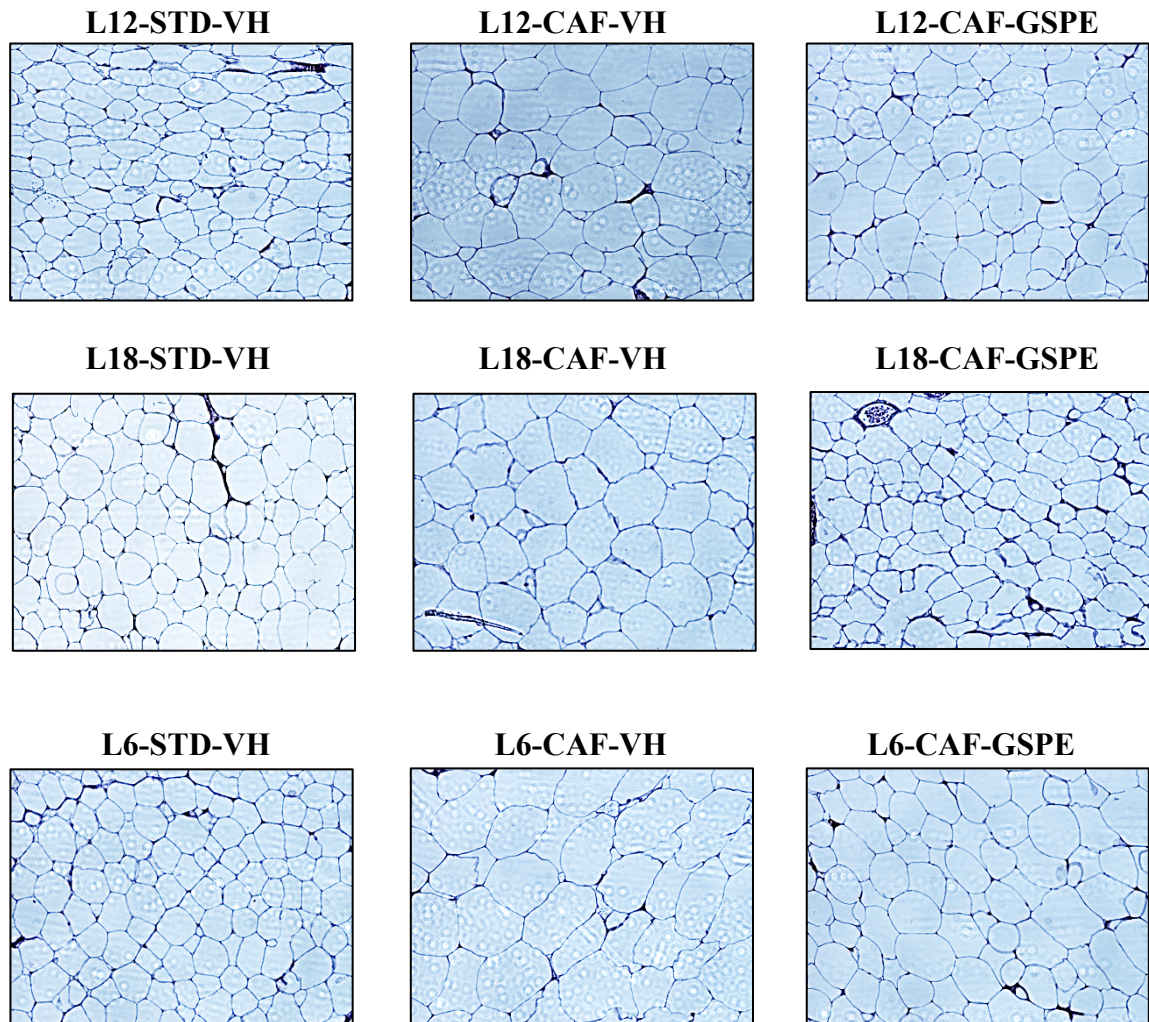

**Figure S4. Representative images of eWAT histology.** Histological study of eWAT morphology of Fischer 344 rats fed with standard diet (STD) or cafeteria diet (CAF) for 9 weeks and treated with GSPE (25 mg/kg body weight) or vehicle (VH) the last 4 weeks of the study; STD-VH group; CAF-VH group; CAF-GSPE group, under different photoperiods; L12, L18 or L6.

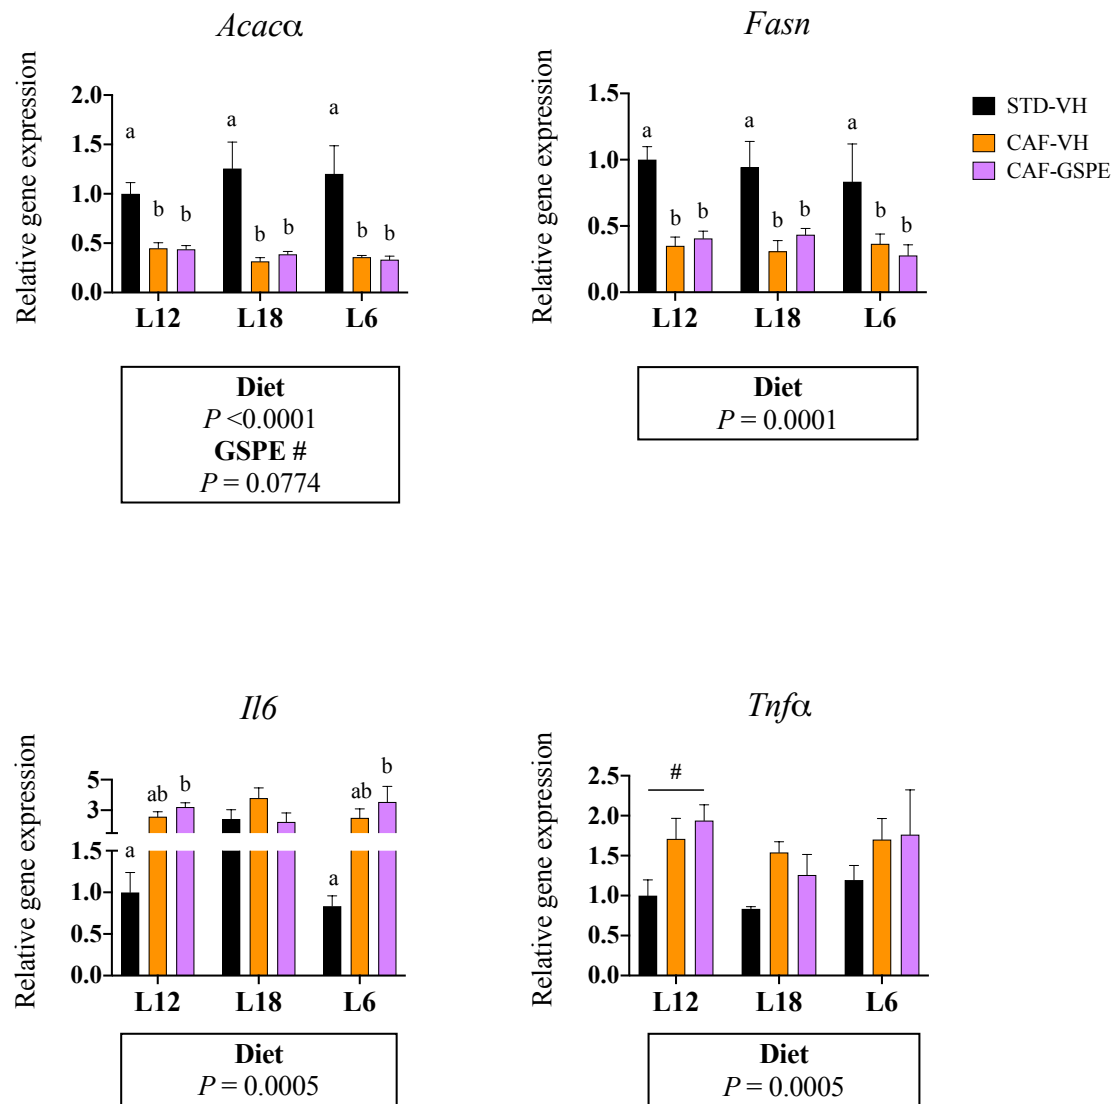

**Figure S5.** Effect of grape seed proanthocyanidin extract (GSPE) consumption at different photoperiods, 12h of light:12h of darkness (L12); 18h of light:6h of darkness (L18); 6h of light:18h of darkness (L6) on the expression of lipogenesis and inflammation-related genes in epididymal white adipose tissue (eWAT) of diet-induced obese rats. Fisher 344 rats were fed standard diet (STD) or cafeteria diet (CAF) for 9 weeks and treated with GSPE (25 mg/kg body weight) or vehicle (VH) the last 4 weeks of the study; STD-VH group; CAF-VH group; CAF-GSPE group, under different photoperiods; L12, L18 or L6. The gene expression was measured by qPCR and normalized by *Ppia*. The relative expression (presented as fold-change) of CAF-VH and CAF-GSPE was normalized to the corresponding STD-VH control group (L12 photoperiod). Significant differences were assessed through two-way ANOVA analysis ( $P < 0.05$ ). **Diet:** diet effect within VH groups; **GSPE:** GSPE effect within CAF groups. Different letters denote significant differences within each photoperiod group (assessed with two-way ANOVA followed by Tukey's *post hoc* test,  $p < 0.05$ ; #:  $p < 0.1$ ).

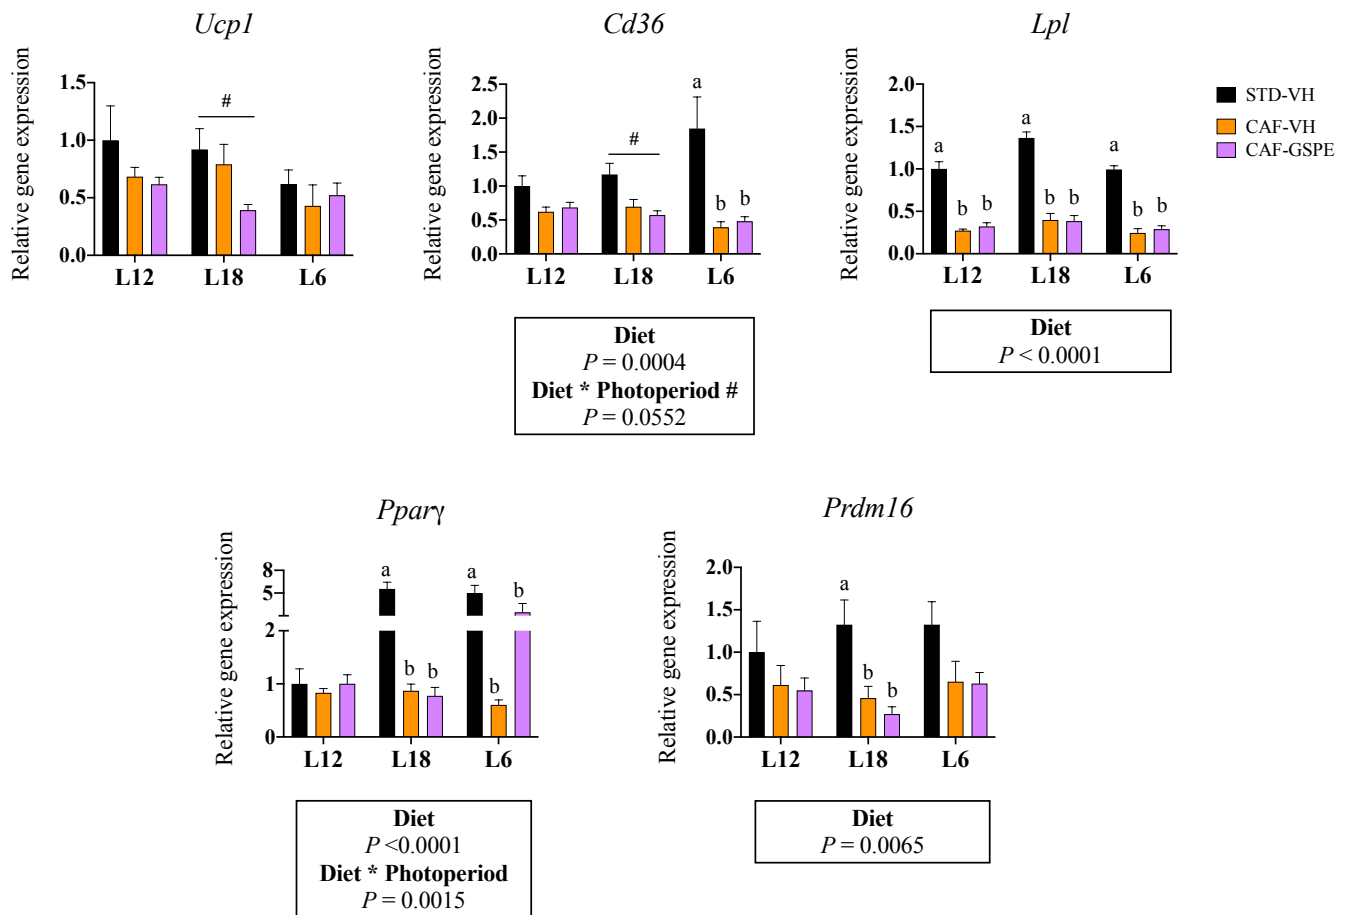

**Figure S6.** Effect of grape seed proanthocyanidin extract (GSPE) consumption at different photoperiods, 12h of light:12h of darkness (L12); 18h of light:6h of darkness (L18); 6h of light:18h of darkness (L6) on the expression of key metabolic genes in brown adipose tissue (BAT) of diet-induced obese rats. Fisher 344 rats were fed standard diet (STD) or cafeteria diet (CAF) for 9 weeks and treated with GSPE (25 mg/kg body weight) or vehicle (VH) the last 4 weeks of the study; STD-VH group; CAF-VH group; CAF-GSPE group, under different photoperiods; L12, L18 or L6. The gene expression was measured by qPCR and normalized by *Ppia*. The relative expression (presented as fold-change) of CAF-VH and CAF-GSPE was normalized to the corresponding STD-VH control group (L12 photoperiod). Significant differences were assessed through two-way ANOVA analysis ( $P < 0.05$ ). **Diet:** diet effect within VH groups; **Diet \* Photoperiod:** interaction effect between CAF diet and photoperiod within VH groups. Different letters denote significant differences within each photoperiod group (assessed with two-way ANOVA followed by Tukey's *post hoc* test,  $p < 0.05$ ; #:  $p < 0.1$ ).
